# Supplementary material for: Evolutionary Conflict Leads to Innovation: Symmetry Breaking in a Spatial Model of RNA-Like Replicators
Source: Life (Basel). 2017 Nov 2;7(4):43. doi: 10.3390/life7040043 (PMC5745556; doi:10.3390/life7040043)
Supplement: Supplementary file 1 [file life-07-00043-s001.zip]

Archive with 5 entries (5 files):
- Video_S2.mp4
- Video_S3_lq.mp4
- Video_S4.mp4
- Paper_Supp.pdf
- Video_S1.mp4
