# Supplementary material for: Evolutionary Conflict Leads to Innovation: Symmetry Breaking in a Spatial Model of RNA-Like Replicators
Source: Life (Basel). 2017 Nov 2;7(4):43. doi: 10.3390/life7040043 (PMC5745556; doi:10.3390/life7040043)
Supplement: Supplementary file 1 [file life-07-00043-s001.zip › Paper_Supp.pdf]

# Supplementary Materials: Evolutionary Conflict Leads to Innovation: Symmetry Breaking in a Spatial Model of RNA-Like Replicators

Samuel H. A. von der Dunk\* 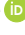, Enrico Sandro Colizzi 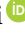 and Paulien Hogeweg \*

## 1. Supplementary Figures

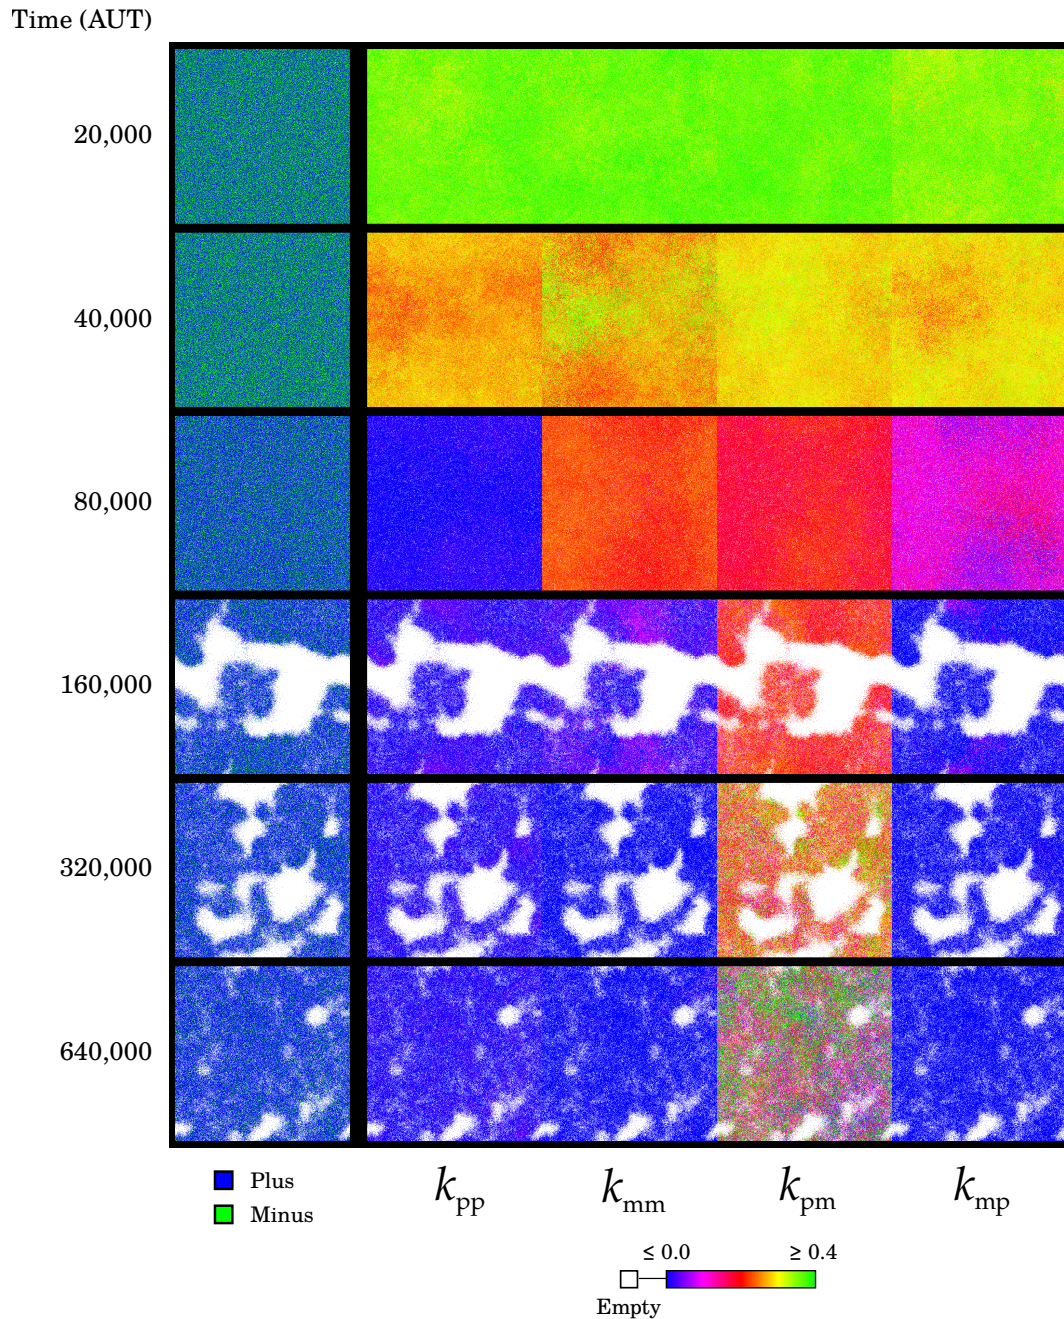

**Figure S1.** Evolutionary dynamics of the full model over time. For each site on the lattice, if it is a replicator, the strand type is shown (far left) and its value of  $k_{pp}$ ,  $k_{mm}$ ,  $k_{pm}$  and  $k_{mp}$  (from left to right). After a stage with only template asymmetry ( $T = 80,000$ ), replicators become catalytically asymmetric as well.

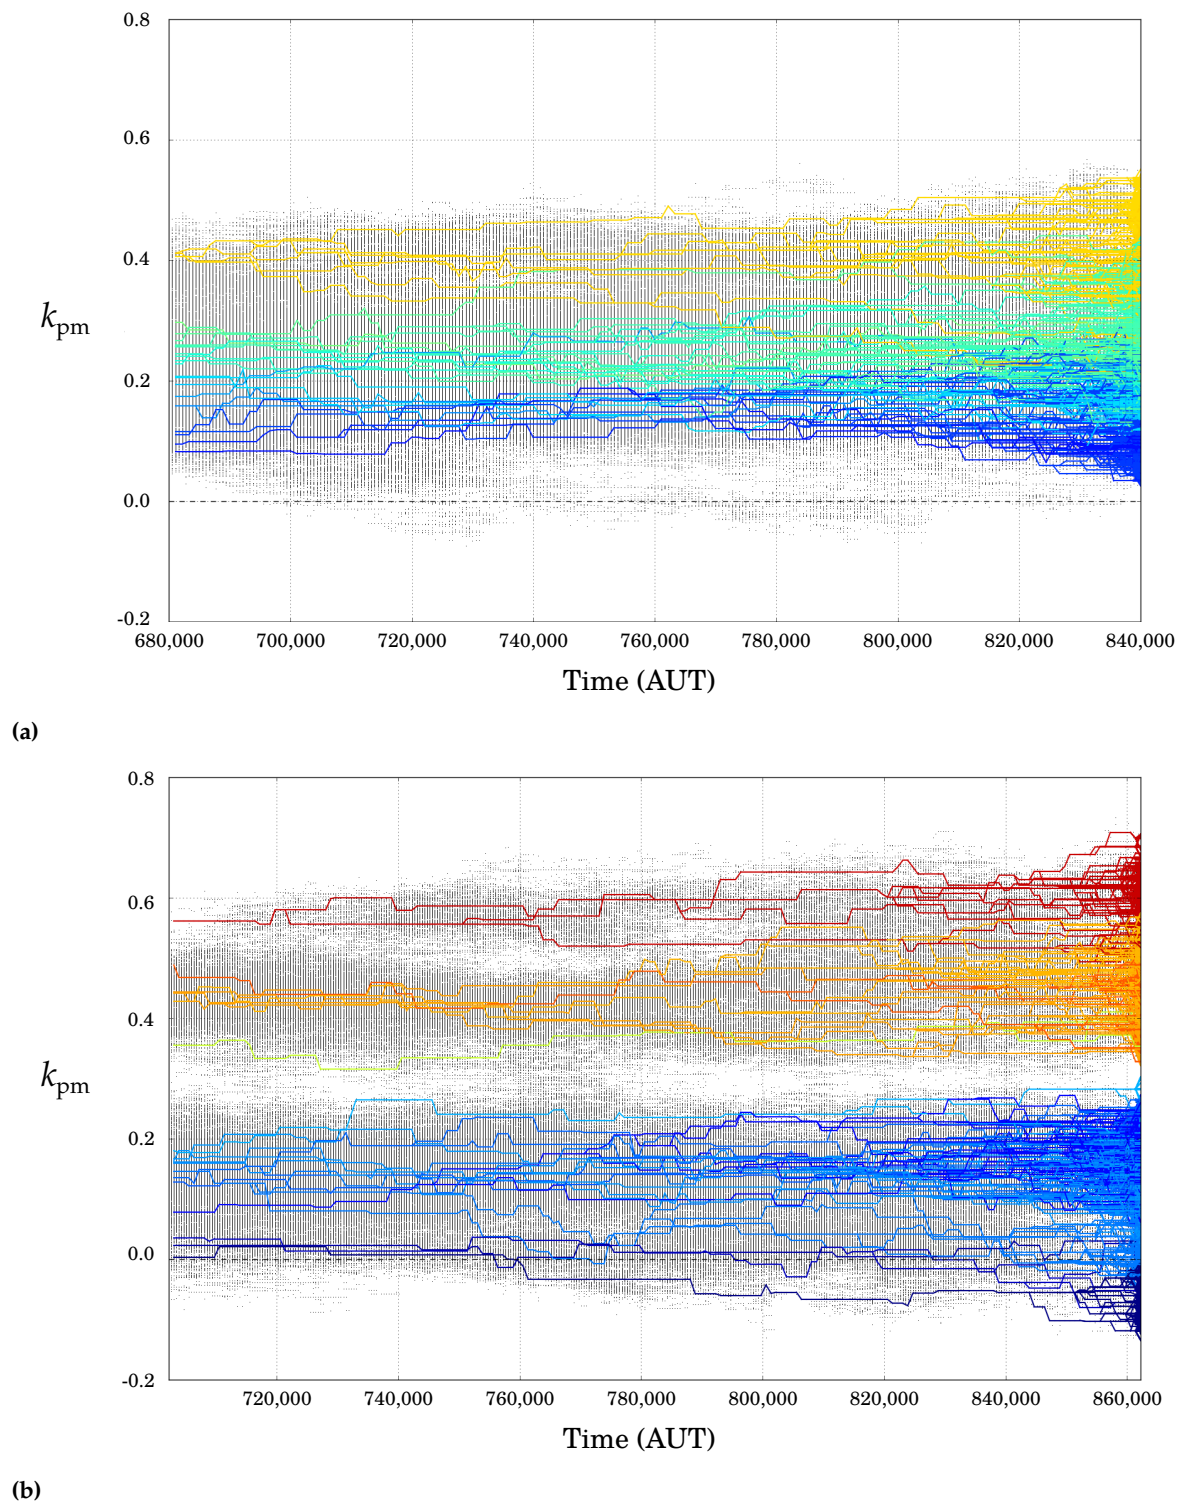

**Figure S2.** Ancestor traces of the full model for (a)  $D = 50$  and (b)  $D = 70$ . For all replicators present at the end of the simulation the ancestors were traced back 160,000 AUT. Lineages are colored according to the value of  $k_{pm}$  of the first ancestor. The figure reveals the coexistence of several lineages with different values of  $k_{pm}$ .

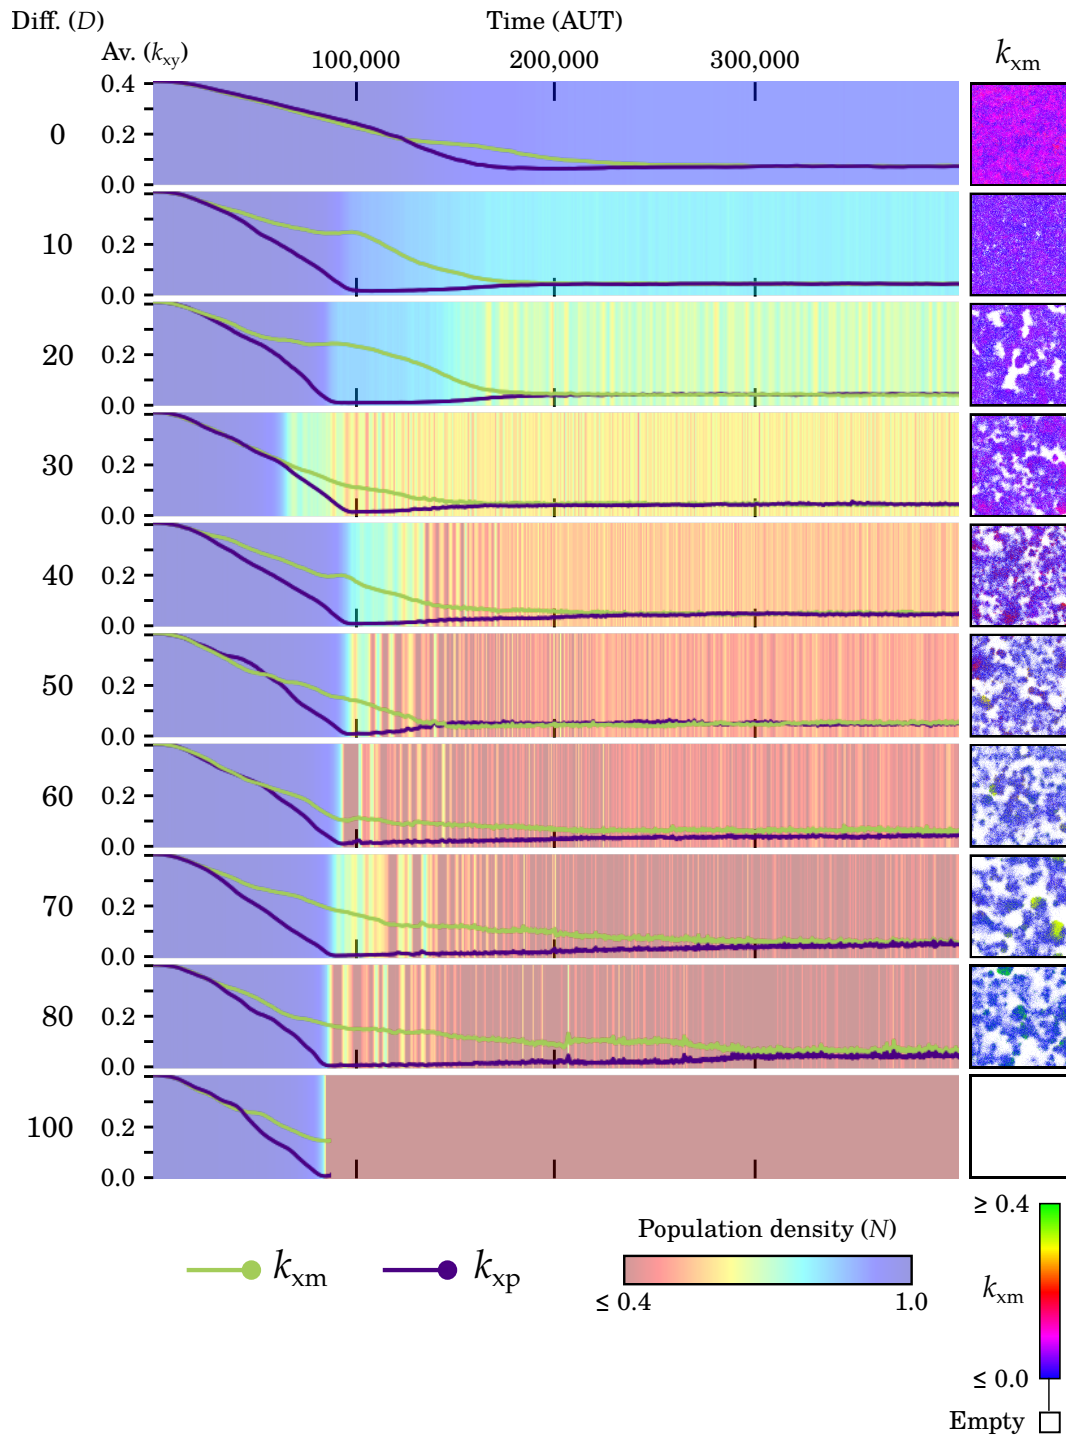

**Figure S3.** Evolutionary dynamics of the template model for different diffusion rates (see Figure 2 for clarification). The right panel shows a snapshot of the field at the end of the timeplot with replicators colored according to their value of  $k_{xm}$ . Template asymmetry suffices for survival at high diffusion, but the population density is low in these cases (cf. Figure 2).

## 2. Supplementary Videos

### 2.1. Video S1: Evolution at Low Diffusion

The evolution of  $k_{pm}$  is shown over time ( $T = 0$  to  $T = 166,667$ ) for  $D = 10$ .

### 2.2. Video S2: Evolution at High Diffusion

The evolution of  $k_{pm}$  is shown over time ( $T = 0$  to  $T = 166,667$ ) for  $D = 70$ . The video is slowed down 4 times compared to Video S1.

### 2.3. Video S3: Evolution of Two Competing Species

The evolution of the catalyst model competing with the basic model is shown. From left to right, for each site the following is shown: the strand type, the value of  $k_{px}$  in the catalyst model, the value of  $k_{mx}$  in the catalyst model and the value of  $k_{xx}$  in the basic model. The species form patches and a wave-pattern emerges.

### 2.4. Video S4: Competition at the Wave-Front

We let catalytically asymmetric replicators (blue) compete with symmetric replicators (green) for a stretch of empty space. Asymmetric replicators invade faster, outcompeting symmetric replicators at the wave-front.
